# Supplementary material for: The effect of the surface energy and structure of the SiC substrate on epitaxial graphene growth
Source: Royal Society of Chemistry journal article supplement (doi:10.1039/c6ra21858j), 2016-01-01
Supplement: c6ra21858j1.pdf [file c6ra21858j1.pdf]

Electronic supplementary information

The Effect of the Surface Energy and Structure of the SiC

Substrate on Epitaxial Graphene Growth

Li Sun<sup>a</sup>, Xiufang Chen<sup>a\*</sup>, Wancheng Yu<sup>a</sup>, Honggang Sun<sup>b\*</sup>, Xian Zhao<sup>a\*</sup>, Xiangang

Xu<sup>a</sup>, Fan Yu<sup>c</sup>, Yunfeng Liu<sup>c</sup>

*a State Key Laboratory of Crystal Materials, Shandong University, Jinan, 250199, China*

*b School of Mechanical, Electrical&Information Engineering, Shandong University, Weihai, 264209, China*

*c Institute of Optics and Electronics, Chinese Academy of Science, Chengdu, 610209, China*

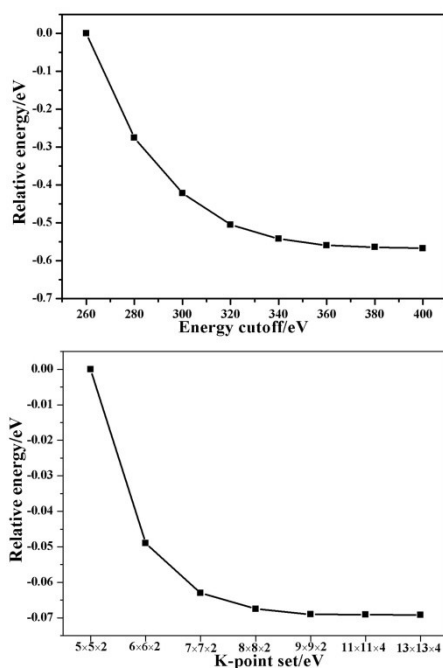

S 1. The convergence tests of energy cutoff and k-point.

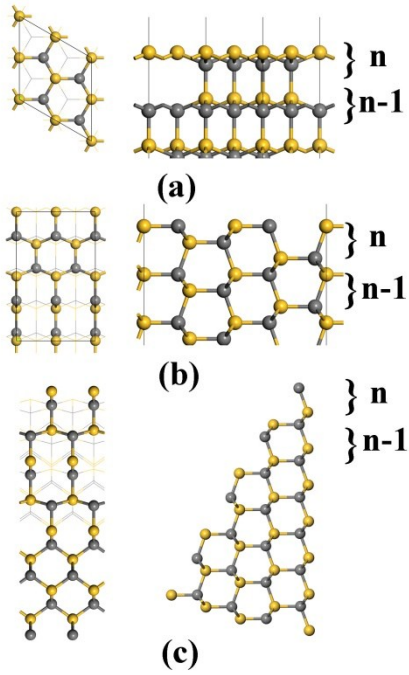

S 2. The SiC surface models of (a) (0001), (b) (1000), and (c) (1-106) faces. The number of layers is labeled in the figure.

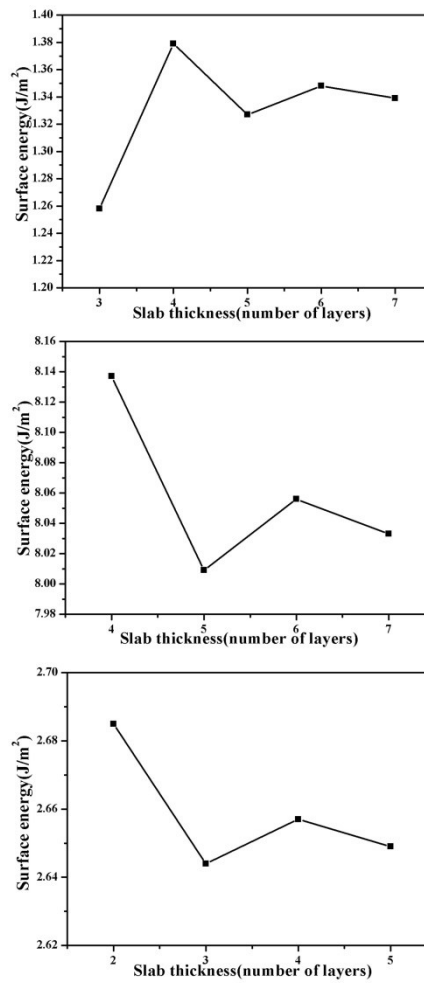

S 3. The surface energy influenced by the number of layers of the SiC surface models.
